# Supplementary material for: Blood Stream Microbiota Dysbiosis Establishing New Research Standards in Cardio-Metabolic Diseases, A Meta-Analysis Study
Source: MDPI journal article supplement (doi:10.3390/microorganisms11030777), 2023-03-17
Supplement: s1 [file s1]

**Table S1. Search strategy for identification of studies to be included in the review**

| <b>Search strategy</b>                                                                                                                                                                                                                                                                                                                                                                                                  |
|-------------------------------------------------------------------------------------------------------------------------------------------------------------------------------------------------------------------------------------------------------------------------------------------------------------------------------------------------------------------------------------------------------------------------|
| #1 (Blood Microbiota OR Blood bacteria a OR Circulating microbiota OR Circulating bacteria OR serum microbial DNA OR Blood microbial signatures OR Circulating microbial signatures)                                                                                                                                                                                                                                    |
| #2 (cardiovascular diseases OR cardiometabolic diseases OR septic shock)                                                                                                                                                                                                                                                                                                                                                |
| #3 (diabetes OR diabetic OR hyperglycemia OR hyperglycaemia OR blood glucose)                                                                                                                                                                                                                                                                                                                                           |
| #4 (#1 AND #2 AND #3)                                                                                                                                                                                                                                                                                                                                                                                                   |
| #5 (Addresses[ptyp] OR Autobiography[ptyp] OR Bibliography[ptyp] OR Biography[ptyp] OR pubmed books[filter] OR Case Reports[ptyp] OR Congresses[ptyp] OR Directory[ptyp] OR Duplicate Publication[ptyp] OR Editorial[ptyp] OR Systematic reviews OR Meta-analysis OR Festschrift[ptyp] OR In Vitro[ptyp] OR Lectures [ptyp] OR Legal Cases[ptyp] OR Portraits[ptyp] OR Retracted Publication[ptyp] OR Twin Study[ptyp]) |
| #6 (#4 NOT #5)                                                                                                                                                                                                                                                                                                                                                                                                          |
